# Supplementary material for: Template-directed synthesis of pyrite (FeS2) nanorod arrays with an enhanced photoresponse
Source: Royal Society of Chemistry journal article supplement (doi:10.1039/c4ta00759j), 2014-01-01
Supplement: c4ta00759j1.pdf [file c4ta00759j1.pdf]

## Supporting information:

# Template-directed synthesis of pyrite FeS<sub>2</sub> nanorod arrays with enhanced photoresponse

*Mudan Wang<sup>1</sup>, Chengcheng Xing<sup>1</sup>, Ke Cao<sup>1</sup>, Lei Zhang<sup>3</sup>, Jiabin Liu<sup>1,\*\*</sup>, Liang Meng<sup>1\*</sup>*

<sup>1</sup> Department of Materials Science and Engineering, Zhejiang University, Hangzhou  
310027, China

<sup>2</sup> Institute of Applied Mechanics, Zhejiang University, Hangzhou 310027, China

<sup>3</sup> School of Materials Science and Engineering, University of Science and Technology  
Beijing, Beijing 100083, China

## METHODS

### Synthesis of FeS<sub>2</sub> nanoparticle films

FeS<sub>2</sub> nanoparticle films were directly prepared on FTO substrate by sol-gel method without pre-coating ZnO seed layer. Fe(NO<sub>3</sub>)<sub>3</sub>·9H<sub>2</sub>O was dissolved in a mixture of 2-methoxyethanol and acetyl acetone with a molar ratio 10:1. The solution was stirred at room

---

\* Corresponding authors. Email: Jiabin Liu ([liujiabin@zju.edu.cn](mailto:liujiabin@zju.edu.cn)); Liang Meng ([mengliang@zju.edu.cn](mailto:mengliang@zju.edu.cn)).  
Phone: +86 57187953134. Fax: +86 57187953134.

temperature for 2 h to form homogeneous nitrate sol with a concentration of 0.6 M. The substrates were dipped into the sol solution and pulled up using a dip coater at a rate of 200 mm min<sup>-1</sup>, and then the coated substrates were dried at 100 °C in air for 20 min. This dipping and drying process was repeated for six cycles to obtain uniform-covered films. The finished gel films were annealed at 500 °C for 30 min to form the precursor films. The obtained precursor films and a certain amount of sublimed sulfur powder were sealed in glass ampoules. These sealed samples were annealed at 400 °C for 10 h

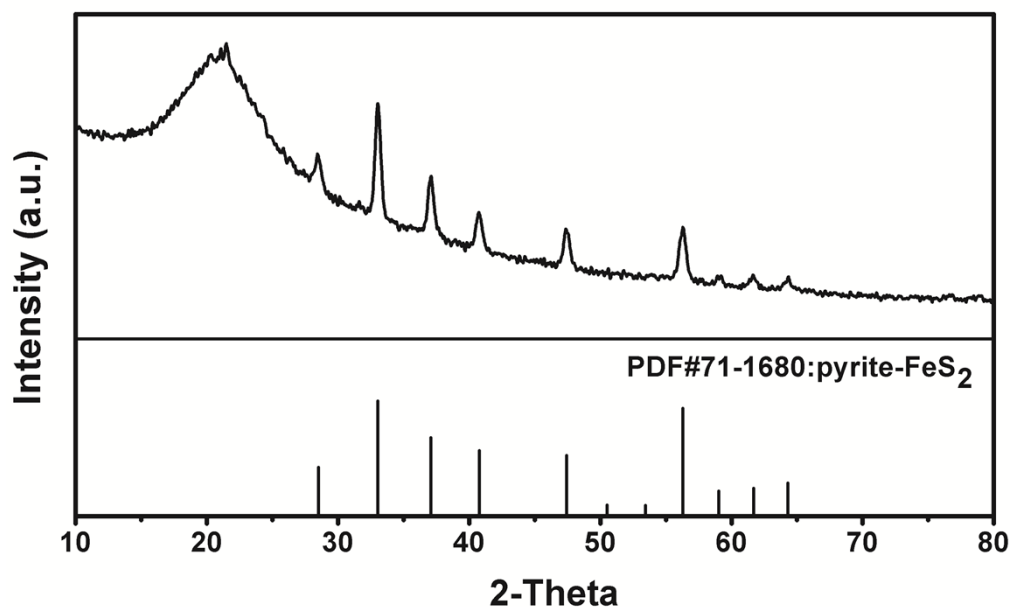

**Figure S1.** XRD patterns of sol-gel prepared FeS<sub>2</sub> nanoparticle films.

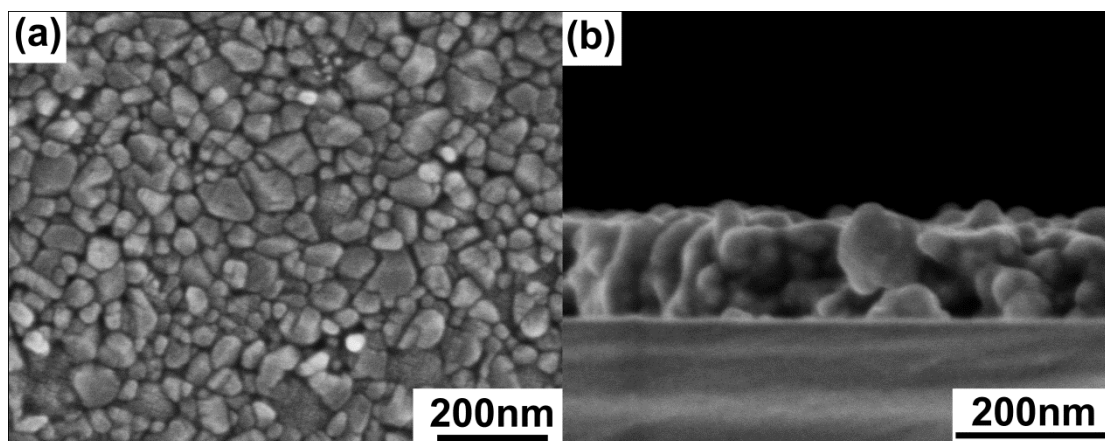

**Figure S2.** SEM images of sol-gel prepared  $\text{FeS}_2$  nanoparticle films: (a) top view and (b) cross-section view.

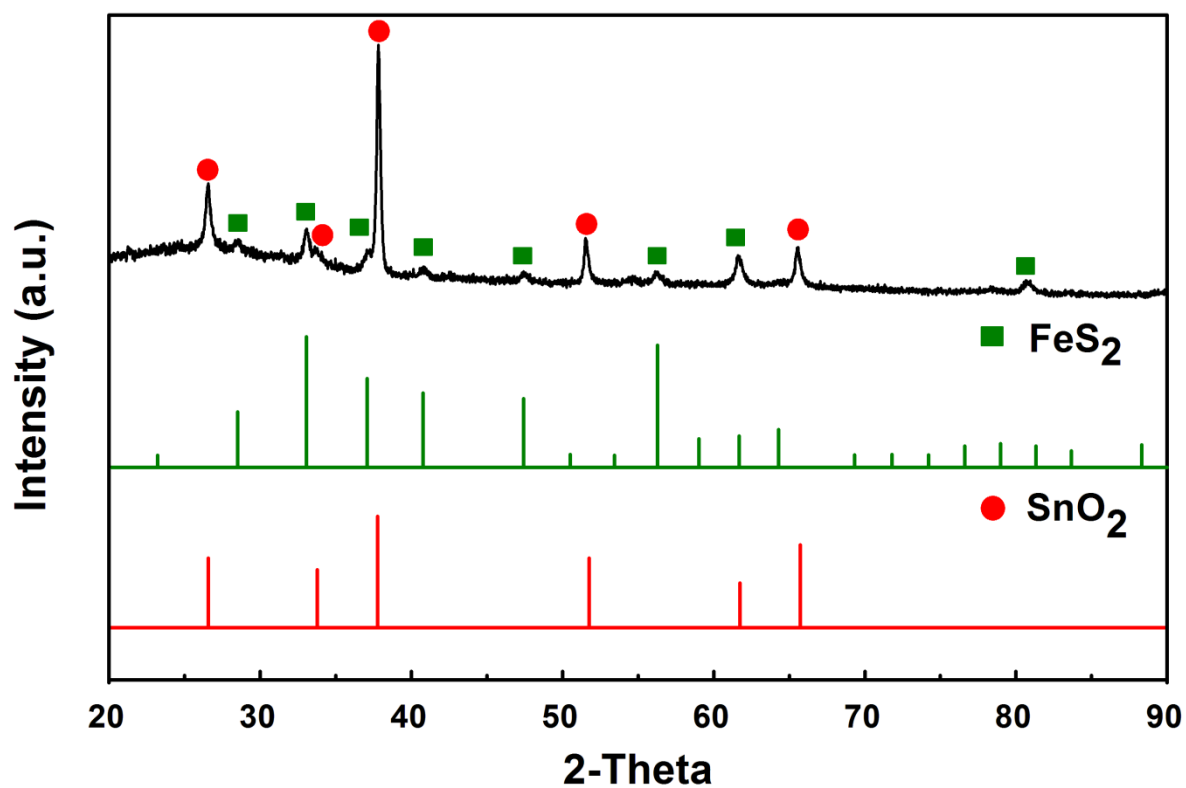

**Figure S3.** XRD pattern of a pyrite  $\text{FeS}_2$  nanorod thin film (immersion in  $\text{Fe}^{3+}$  solution for 1h) after 1 year storage in a vacuum drier.
